# Supplementary material for: The homo-oligomerisation of both Sas-6 and Ana2 is required for efficient centriole assembly in flies
Source: eLife journal article supplement (doi:10.7554/elife.07236), 2015-05-23
Supplement: supp [file elife-07236-supp-v1.zip]

Archive with 2 entries (2 files):
- elife_poa_e07236_Figure_3_figure_supplement_1.pdf
- elife_poa_e07236_Figure_2_figure_supplement_1.pdf
